1  
2 **Degradation of recalcitrant polyurethane and**  
3 **xenobiotic additives by a selected landfill microbial**  
4 **community and its biodegradative potential revealed**  
5 **by proximity ligation-based metagenomic analysis**  
6

7 Itzel Gaytán<sup>1†</sup>, Ayixon Sánchez-Reyes<sup>1†</sup>, Manuel Burelo<sup>2</sup>, Martín  
8 Vargas-Suárez<sup>1</sup>, Ivan Liachko<sup>3</sup>, Maximilian Press<sup>3</sup>, Shawn Sullivan<sup>3</sup>,  
9 Javier Cruz-Gómez<sup>4</sup> and Herminia Loza-Tavera<sup>1\*</sup>

10  
11 <sup>1</sup>Departamento de Bioquímica, <sup>2</sup>Departamento de Química Analítica,  
12 <sup>4</sup>Departamento de Ingeniería Química, Facultad de Química, Universidad  
13 Nacional Autónoma de México, Ave. Universidad 3000, Col. UNAM,  
14 Ciudad de México, 04510, MÉXICO. <sup>3</sup>Phase Genomics Inc, 1617 8<sup>th</sup> Ave  
15 N, Seattle, WA 98109, USA.  
16

17  
18 †These authors contributed equally: Itzel Gaytán, Ayixon Sánchez-Reyes

19 \*To whom correspondence should be addressed

20 Tel. +52 (55) 5622-5280

21 e-mail: [hlozat@unam.mx](mailto:hlozat@unam.mx)

22

23

24 **Abstract**

25 Polyurethanes (PU) are the sixth more produced plastics with around 19-million  
26 tons/year, but since they are not recyclable they are burnt or landfilled, generating  
27 ecological damage. To elucidate the mechanisms that landfill microbial communities  
28 perform to attack recalcitrant PU plastic, we studied the BP8 community selected by its  
29 capability to grow in a water PU dispersion (WPUD) that contains a polyether-  
30 polyurethane-acrylate (PE-PU-A) copolymer and xenobiotic additives (N-methyl 2-  
31 pyrrolidone, isopropanol and glycol ethers), and performed a proximity ligation-based  
32 metagenomic analysis for revealing the community structure and potential biodegradative  
33 capacity. Additives were consumed early whereas the copolymer was cleaved throughout  
34 the 25-days incubation. BP8 metagenomic deconvolution reconstructed five genomes,  
35 three of them from novel species. Genes encoding enzymes for additives biodegradation  
36 were predicted. The chemical and physical analysis of the biodegradation process, and  
37 the identified biodegradation products show that BP8 cleaves esters, aromatic urethanes,  
38 C-C and ether groups by hydrolytic and oxidative mechanisms. The metagenomic  
39 analysis allowed to predicting comprehensive metabolic pathways and enzymes that  
40 explain the observed PU biodegradation. This is the first study revealing the metabolic  
41 potential of a landfill microbial community that thrives within a WPUD system and shows  
42 potential for bioremediation of polyurethane- and xenobiotic additives-contaminated sites.

43

## 44 **Introduction**

45 Plastic pollution represents a pervasive anthropogenic threat for the survival of natural  
46 ecosystems. Worldwide, plastics have become so abundant that they have been  
47 proposed as geological markers for the Anthropocene era [1]. In 2017, 348 million tons of  
48 plastics were manufactured [2] and their production keeps increasing. Polyurethanes  
49 (PU) are versatile plastics produced as thermoplastics, thermosets, coatings, adhesives,  
50 sealants and elastomers that are incorporated into our daily life in building insulation,  
51 refrigerators and freezers, furniture and bedding, footwear, automotive, coatings,  
52 adhesives, and others. PU has been ranked as the sixth most used polymer worldwide  
53 with a production of 18 million tons in 2016 [3,4]. The extensive utilization of PU  
54 generates wastes that are mainly disposed in municipal landfills where, because of its  
55 structural complexity will remain as polymeric structures for decades, or are burnt  
56 generating toxic substances that negatively impact human health and ecosystems [3].  
57 Furthermore, some PU such as polyether (PE)-PU are more recalcitrant than others, and  
58 additionally, some polyurethane-based liquid formulations contain additives that include  
59 secondary alcohols and glycol ethers that function as solvents or coalescing agents.  
60 Glycol ethers enter the environment in substantial quantities, are toxic for many microbial  
61 species [5-7] and represent a potential hazard for human health [8].

62 Over the last three decades, several research groups have isolated  
63 microorganisms with capacity to attack PU [9-15] and degrade xenobiotic additives [7, 9,  
64 16, 17], and the abilities from several fungal and bacterial communities have been  
65 assessed in compost, soil, or liquid cultures [18-21] and in different activated sludges [22-  
66 25]. However, PU biodegradation is still a challenge for environmental and biological  
67 disciplines and little is known about structure or potential degradative enzymatic

68 pathways of microbial communities capable of PU biodegradation. Metagenomics  
69 provides access to the structure and genetic potential of microbial communities, helping  
70 to understand the ecophysiological relationships governing the dynamics of their  
71 populations in the environment. Recently, a new approach has been developed that  
72 allows the reconstruction of individual genomes of microbial species using physical  
73 interactions between sequences within cells [26]. This approach involves Hi-C proximity  
74 ligation and yields direct evidence of sequences co-occurrence within a genome, which is  
75 used for *de novo* assembly, identification of complete and novel genomes [27] and for  
76 testing functional and phylogenetic hypotheses, surpassing other methods for clustering  
77 contigs by taxonomic origins [28-30].

78 To characterize the biodegradation process of the recalcitrant plastic PE-PU by  
79 microbial communities, we adopted the commercial water PU dispersion PolyLack®  
80 (Sayer Lack, México) that contains a proprietary aromatic polyether-polyurethane-  
81 acrylate (PE-PU-A) copolymer and the xenobiotic additives N-methyl 2-pyrrolidone  
82 (NMP), isopropanol (IP) 2-butoxyethanol (2-BE), dipropylenglycol butyl ether (DPGB),  
83 and dipropylenglycol methyl ether (DPGM). In this work, we provide comprehensive  
84 chemical and physical evidences for the capacity of a selected landfill microbial  
85 community to degrade an aromatic PE-PU-A copolymer and the aforementioned  
86 xenobiotic additives, and analyze its structure and phenotypic potential by applying the  
87 Hi-C proximity ligation technology. Based on these analyses, we identified a novel  
88 microbial landscape that can deal with PE-PU-A and xenobiotics additives degradation  
89 and proposed the putative metabolic pathways and genes that can account for these  
90 capabilities. This is one of the few studies that combine physical and chemical analyses  
91 with metagenomics to elucidate possible metabolic pathways involved in xenobiotics

92 biodegradation, and the first metagenomic analysis of a polyurethane-degrading enriched  
93 landfill community. Understanding these pathways will help to design environmental  
94 biotechnological strategies that contribute to mitigate plastics and xenobiotics pollution  
95 and to achieve a better environmental quality.

## 96 **Materials and Methods**

### 97 **Microbiological techniques**

98 The BP8 community, studied in this work, was selected by inoculating deteriorated pieces  
99 of PU foam collected at El Bordo Poniente municipal landfill, as previously described [21],  
100 into a minimal medium (MM) [10] containing PolyLack<sup>®</sup> (0.3% v/v), as the sole carbon  
101 source (MM-PolyLack). PolyLack<sup>®</sup> (Sayer Lack, Prod. Num. UB-0810, México) contains a  
102 proprietary aromatic PE-PU-A copolymer ( $\leq 30\%$  w/v), and the additives NMP ( $\leq 6\%$  v/v),  
103 2-BE ( $\leq 5\%$  v/v), IP ( $\leq 3\%$  v/v), DPGB ( $\leq 2\%$  v/v), DPGM ( $\leq 1\%$  v/v), and silica ( $\leq 3\%$  w/v)  
104 [31]. BP8 growth was quantified by dry weight. For that, flasks with MM-PolyLack (25 ml)  
105 were inoculated with fresh cells (3 mg/ml) harvested from pre-cultures grown in MM-  
106 PolyLack for 48 h at 37°C, 220 rpm. At different incubation times, cells of one flask were  
107 harvested, washed three times with phosphate buffer (50 mM, pH 7) and dried to  
108 constant weight. Emulsification index (EI<sub>24</sub>) and cell surface hydrophobicity (CSH) were  
109 determined as described [32]. To observe cell-copolymer interactions, cells were fixed  
110 with 3% (v/v) glutaraldehyde in phosphate buffer (100 mM, pH 7.4), at 4°C overnight,  
111 washed three times, dehydrated with serial dilutions of ethanol, coated with gold and  
112 analyzed in a JEOL JSM-5900-LV electron microscope.

### 113 **Analytical techniques**

114 Nuclear magnetic resonance spectra from dried PolyLack<sup>®</sup> dissolved in C<sub>5</sub>D<sub>5</sub>N (30 mg/ml)  
115 were recorded at 298 K in a Bruker Avance 400 NMR (Billerica, MA, USA) at 400 MHz

116 (<sup>1</sup>H). For most of the analytical techniques, cell-free supernatants (CFS) were obtained by  
117 centrifugation at 17 211 x g for 10 min, filtered through Whatman grade 41 paper, and  
118 dried at 37°C for 5 days. Carbon content was determined in a Perkin Elmer Elemental  
119 Analyzer (2400 CHN/O, Series II, Shelton, CT., USA). For gas chromatography coupled  
120 to mass spectrometry (GC-MS) analysis, 25 ml CFS were extracted in 6 ml LC-18  
121 cartridges (Supelco) at a flow rate of 2 ml/min, eluted with 2 ml chloroform:methanol (1:1,  
122 v/v) and concentrated to 0.5 ml. Samples were injected in an Agilent GC system (7890B,  
123 Santa Clara, CA, USA) using two 5%-phenyl-methylpolysiloxane columns (15 m x 250  
124 µm x 0.25 µm). Oven was heated from 50°C to 300°C at 20°C/min, Helium was used as  
125 carrier gas at a flow rate of 1 ml/min. The injector temperature was 300°C. For the  
126 quantification of additives, pure compounds (Sigma-Aldrich Chemicals ≥98% purity) were  
127 used for standard curves. Identification of biodegradation products was performed in an  
128 Agilent Quadrupole Mass Analyzer (5977A MSD, Santa Clara, CA, USA) with electronic  
129 ionization energy of 1459 EMV and the mass range scanned at 30-550 amu. Scan rate  
130 was 2.8 spec/s. Data acquisition was performed with the Enhanced MassHunter software  
131 system. Compounds were identified based on mass spectra compared to the NIST  
132 database (2002 Library). Fourier transform infrared spectroscopy (FTIR) analyses were  
133 performed in a Perkin Elmer spectrometer (Spectrum 400, Waltham, MA, USA) in  
134 attenuated total reflection mode; 64 scans with a resolution of 4 cm<sup>-1</sup> were averaged in  
135 the range of 500-4000 cm<sup>-1</sup>, processed and analyzed (Spectrum v6.3.5.0176 software).  
136 Derivative thermogravimetric analyses (DTG) were performed in a Perkin Elmer  
137 Thermogravimetric Analyzer (TGA 4000, Waltham, MA, USA) on 25 mg of dried CFS  
138 samples heated 30-500°C at a rate of 20°C/min, under a N<sub>2</sub> atmosphere analyzing 10 mg  
139 of dry CFS. Differential Scanning Calorimetry (DSC) was performed analyzing 10 mg of

140 dry CFS in a Q2000 (TA Instrument, New Castle, DE, USA) at a rate of 10°C/min, under  
141 a nitrogen flow of 50 ml/min, at a 20-600°C range. Gel Permeation Chromatography was  
142 performed in a Waters 2695 Alliance Separation Module GPC (Milford, MA, USA) at 30°C  
143 in tetrahydrofuran, using a universal column and a flow rate of 0.3 ml/min in CFS. All the  
144 analyses were performed at least in three replicates. Controls were non-inoculated MM-  
145 PolyLack supernatants similarly processed.

### 146 **Hi-C proximity ligation based metagenomic analysis**

147 BP8 community cells cultured for 5 days in 50 ml of MM-PolyLack were harvested and  
148 washed three times with phosphate buffer. Cells were resuspended in 20 ml TBS buffer  
149 with 1% (v/v) formaldehyde (J.T. Baker) (crosslinker) and incubated 30 min with periodic  
150 mixing. The crosslinker was quenched with glycine (0.2 g) (Bio-Rad) for 20 min,  
151 thereafter cells were centrifuged, lyophilized and frozen at -20°C. For DNA extraction, cell  
152 pellets (100 µl) were resuspended in 500 µl of TBS buffer containing 1% (v/v) Triton-X  
153 100 and protease inhibitors [27]. DNA was digested with *Sau3AI* and *MluCI* and  
154 biotinylated with DNA Polymerase I Klenow fragment (New England Biolabs) followed by  
155 ligation reactions incubated for 4 h and then overnight at 70°C to reverse crosslinking.  
156 The Hi-C DNA library was constructed by using the HyperPrep Kit (KAPA Biosystems,  
157 Wilmington, MA, USA). A shotgun library was also prepared from DNA extracted from  
158 non-crosslinked cells using Nextera DNA Sample Preparation Kit (Illumina). The two  
159 libraries were paired-end sequenced using NextSeq 500 Illumina platform (Illumina, San  
160 Diego, CA, USA). *De novo* metagenome draft assemblies from the raw reads were made  
161 using the metaSPAdes assembler [33]. Hi-C reads were then aligned to the contigs  
162 obtained from the shotgun library using the Burrows-Wheeler Alignment tool [34]  
163 requiring exact read matching. The ProxiMeta algorithm was used to cluster the contigs

164 of the draft metagenome assembly into individual genomes [27]. Additionally, we  
165 performed a community taxonomic profiling from shotgun reads using MetaPhlAn tool  
166 [35]. Genome completeness, contamination, and other genomic characteristics were  
167 evaluated using CheckM pipeline [36]. Phylogenetic analysis was performed using the  
168 single copy molecular markers, DNA gyrase subunit A and ribosomal proteins L3 and S5,  
169 selected from each deconvoluted genome and compared to homologous sequences from  
170 GenBank. Alignments were cured with Gblocks tool  
171 ([http://phylogeny.lirmm.fr/phylo\\_cgi/one\\_task.cgi?task\\_type=gblocks](http://phylogeny.lirmm.fr/phylo_cgi/one_task.cgi?task_type=gblocks)) and WAG plus G  
172 evolutionary models were selected using Smart Model Selection tool [37]. Finally,  
173 phylogeny was inferred with the graphical interface of SeaView [38] using the Maximum  
174 Likelihood method. To compare genetic relatedness, Average Nucleotide Identity (ANI)  
175 between the genomes and the closest phylogenetic neighbors was calculated [39]. Open  
176 reading frames were identified using MetaGeneMark [40]. KO assignments (KEGG  
177 Orthology) and KEGG pathways reconstruction were performed with GhostKOALA server  
178 and KEGG Mapper tool, respectively [41]. All the xenobiotic degradation pathways were  
179 manually curated to only report those pathways in which most of the enzymes were  
180 encoded in the BP8 metagenome.

## 181 **Data availability**

182 Genomes described in this manuscript were deposited to GenBank under Bioproject  
183 Accession number: PRJNA488119.

## 184 **Results**

### 185 **Growth and interactions of BP8 cells with PolyLack<sup>®</sup>**

186 The BP8 community cultivated in MM-PolyLack for 25 days exhibited a biphasic growth  
187 with a first phase, from 0-13 days, presenting a growth rate (2-4 days) of  $0.008 \text{ h}^{-1}$  and a



188 second phase, from 13-25 days, with a growth rate (13-20 days) of 0.005 h<sup>-1</sup>. Biomass  
189 increased from 0.32 to 2.9 mg/ml and consumed 50.3% of the carbon from the medium at  
190 25 days (Figure 1a). EI<sub>24</sub> initial value was 70%, it decreased to 24% at 20 days and  
191 increased again to 70%. CSH started at 62% and decreased to 25% at the first growth  
192 phase, thereafter it increased to 42% and remained constant until 20 days to increase to  
193 67% at the end of the second phase (Figure 1b). SEM analysis at 10 days of cultivation  
194 revealed multiple-sized (0.5-1.5 μm) rod-shaped cells aggregated and attached to  
195 copolymer particles (Figure 1c). The changes in CSH and EI<sub>24</sub>, reflect the complex cell-  
196 substrate interactions involved in promoting substrate bioaccessibility and mineralization,  
197 as has been observed in bacteria degrading other xenobiotics [42, 43].

### 198 **Chemical and physical changes in PolyLack<sup>®</sup> components generated by the BP8** 199 **community**

200 To characterize the biodegradative activity of the BP8 community on the PolyLack<sup>®</sup>  
201 components, we performed different analytical techniques. GC-MS analysis of the CFS  
202 revealed that BP8 metabolized the xenobiotic additives, NMP and IP at the first day of  
203 cultivation, 2-BE at the fourth day and DPGM and DPGB were metabolized 85 and 73%  
204 respectively at the first day, and remained constant until the end of the experiment  
205 (Figure 2). Since the PE-PU-A copolymer structure is unknown, we proposed a  
206 hypothetical structure (Figure S1), based on <sup>1</sup>H-NMR, the manufacturer's technical sheet  
207 and in the most frequently used chemicals for the synthesis of this copolymer [44-46].  
208 Since the first day of cultivation, complex and diverse chemical compounds such as  
209 aromatics, nitrogen-containing, ethers, esters, aliphatics, alcohols and organic acids,  
210 derived from the copolymer breakdown were observed. During the first 3 days (log  
211 phase) the degradation products were low abundant, at 10 days (intermediate lag phase)

212 accumulation occurred, and during the second log phase their abundance decreased.  
213 Notably, isocyanates (2,4-toluene diisocyanate (TDI) and methylene diphenyl  
214 diisocyanate (MDI)) derivatives were aromatic amines observed maximal at the beginning  
215 and diminished throughout the cultivation period (Figure 2, S2), suggesting that  
216 metabolization of the urethane groups is being achieved. FTIR of CFS revealed changes  
217 in PE-PU-A functional groups. The signal intensity of the C=O stretch from urethane and  
218 acrylate carbonyl groups ( $1730\text{ cm}^{-1}$ ) increased at 5 days and lately decreased,  
219 suggesting hydrolysis and subsequent catabolism of urethanes and acrylates. The signal  
220 for aromatic groups C=C stretch ( $1600\text{ cm}^{-1}$ ) considerably decreased at 20 days, while  
221 the signal for aromatic C-C stretch ( $1380\text{ cm}^{-1}$ ) showed variable intensities at different  
222 days, and a new C-C signal for aromatics ( $1415\text{ cm}^{-1}$ ) appeared at 20 days, indicating  
223 the cleavage of the aromatic rings. The urethane N-H bending plus C-N stretch signal ( $1530\text{ cm}^{-1}$ )  
224 slightly decreased at 15 days and increased at the end of the cultivation time,  
225 whereas urethane C-N stretching band ( $1231\text{ cm}^{-1}$ ) significantly increased, indicating  
226 urethane attack. Signals associated with urethane C-O-C stretch ( $1086\text{ cm}^{-1}$ ,  $1049\text{ cm}^{-1}$ )  
227 and C-O-C symmetric stretch ( $977\text{ cm}^{-1}$ ) decreased during the cultivation period,  
228 indicating microbial activity on the ether groups. The signal for the acrylate's vinyl group  
229 C=C-H out of plane ( $850\text{ cm}^{-1}$ ) decreased at 20 days, indicating the cleavage of the  
230 acrylate component. Also, the aliphatic chain signals ( $704$  and  $520\text{ cm}^{-1}$ ) decreased  
231 during the cultivation period (Figure 3a). DTG thermograms exhibited four stages of  
232 thermal decomposition corresponding to the functional groups of the copolymer. Stages II  
233 and IV, for urethane and ether groups respectively, reduced their masses at early  
234 cultivation times, while stage III, for esters, steadily kept reducing its mass during the  
235 whole experimental period. Interestingly, stage I, which accounts for low molecular weight

236 compounds, in this case biodegradation products, showed a fluctuating behavior that  
237 increased at 10 days, and decreased afterwards (Figure 3b). DSC analysis of the  
238 copolymer showed multiple thermal transitions revealing complex microstructures: the  
239 glass transition temperature ( $T_g$ : 50.2°C) reflects the proportion of soft and hard  
240 segments; the three melting temperatures ( $T_m$ -I: 70°C,  $T_m$ -II: 210.6°C,  $T_m$ -III: 398.1°C)  
241 are associated with the hard segments of the polymer and the crystallization temperature  
242 ( $T_c$ : 459.6°C) is attributed to heat-directed crystallization of copolymer chains [47, 48]  
243 (Figure 3c). BP8 biodegradative activity caused  $T_g$  decrease (46.2°C), changes in  $T_m$ s,  
244 and strong decrease in  $T_c$  area, indicating that BP8 disrupts both, the soft and the hard  
245 segments (associated with urethane groups) (Figure 3, Table S1). GPC analysis showed  
246 that the number-average molecular weight of the copolymer decreased 35.6% and the  
247 PDI increased to values higher than 2, at 25 days of cultivation with BP8 (Table S2). All  
248 these results indicate that the degradative activity of the BP8 community generates  
249 changes in the soft and hard segments of the copolymer microstructure resulting from the  
250 attack to the different functional groups, including the more recalcitrant ether and  
251 urethane groups.

## 252 **Community structure and metagenomic deconvolution of the BP8 community**

253 Analysis of the BP8 community taxonomic profile with MetaPhlAn, by using 17 282 414  
254 reads, detected five bacterial orders (abundance), *Rhodobacterales* (83%), *Rhizobiales*  
255 (8.9%), *Burkholderiales* (6.8%), *Actinomycetales* (0.83%), *Sphingobacterales* (0.08%),  
256 and one viral order *Caudovirales* (0.33%). Bacteria included 16 genera, being the most  
257 abundant *Paracoccus* (83.9%) and *Ochrobactrum* (8.7%) (Figure S3). *De novo* assembly  
258 of the shotgun metagenome sequences generated 3 072 contigs with a total length of 17  
259 618 521 bp. Alignment of Hi-C reads to this assembly allowed the deconvolution of five

260 genome clusters, three near complete drafts (>95%), and two substantially complete  
261 drafts (89 and 71%) [36] (Table S3). The phylogenetic analysis showed well-supported  
262 clades within *Paracoccus*, *Chryseobacterium*, *Parapedobacter*, a member of the  
263 *Microbacteriaceae* family, and *Ochrobactrum intermedium* (Figure S4). The deconvoluted  
264 genomes of *Paracoccus* sp. BP8 and *O. intermedium* BP8.5 showed low novelty scores  
265 and high ANI values compared to their closest phylogenetic relatives, while  
266 *Chryseobacterium* sp. BP8.2, *Parapedobacter* sp. BP8.3 and the *Microbacteriaceae*  
267 bacterium BP8.4 showed high novelty scores and low ANI values (<95%) indicating they  
268 are new species. GC content and genomes' sizes were similar to the closest relatives  
269 except for the *O. intermedium* BP8.5 genome size, probably because of the low genome  
270 completeness (Table S3, S4).

#### 271 **Analysis of the xenobiotic metabolism encoded in the BP8 metagenome**

272 In all the genomes, except in *O. intermedium* BP8.5, the genes and proteins assigned  
273 were in the range reported for the phylogenetically related members (Table S3, S4).  
274 Reconstruction of the metabolic pathways encoded in the BP8 metagenome was  
275 performed with 18 386 ORFs from which 8 637 were annotated into KEGG Orthology  
276 groups and the rest was not assigned to any orthologous functional category. Analysis of  
277 the BP8 xenobiotic metabolism identified 215 sequences encoding 59 unique proteins  
278 participating in pathways for benzoate (ko00362), fluorobenzoate (ko00364),  
279 aminobenzoate (ko00627), chlorocyclohexane and chlorobenzene (ko00361), and n-  
280 alkanes (ko00071) degradation. The most relevant enzymes are listed in Table 1. The  
281 genes for benzoate metabolism include all the enzymes for benzoate and 4-  
282 methoxybenzoate activation as well as 4-methoxybenzoate monooxygenase, a O-  
283 demethylating enzyme that transforms methoxybenzoate to hydroxybenzoate, and for

284 their subsequent transformation to  $\beta$ -ketoadipate (first 18 EC numbers in Table 1). Two  
285 genes encoding carboxymethylene butanolidase that cleavages the ring of cyclic ester  
286 diene lactone to produce maleylacetate, acting on the fluorobenzoate and  
287 chlorocyclohexane and chlorobenzene metabolisms, were identified. Genes encoding  
288 enzymes for the aminobenzoate pathway, such as 4-hydroxybenzoate decarboxylase  
289 that participates in the transformation of phenol into hydroxybenzoate, amidase that  
290 transforms benzamide into benzoate, and benzoyl phosphate phosphohydrolase that  
291 converts benzoyl phosphate into benzoate, were identified. All the genes encoding  
292 enzymes needed for chlorocyclohexane and chlorobenzene degradation, the specific 2,4-  
293 dichlorophenol 6-monooxygenase, the enzymes that transform 4-chlorophenol to cis-  
294 acetylacrylate (EC1.13.11.1, EC5.5.1.1 and EC3.1.1.45), and the 2-haloacid  
295 dehalogenase, which eliminates halogens from alkanes, were found. Likewise, genes  
296 encoding enzymes for n-alkanes degradation (Table 1 Alkanes metabolism), as well as  
297 all the enzymes for beta-oxidation were also detected.

298 **BP8 community phenotypic potential to biodegrade the xenobiotic additives**  
299 **present in PolyLack<sup>®</sup>**

300 *NMP degradation.* Genes encoding putative proteins for NMP degradation, with  
301 significant similarity (>40%) to the enzymes of *Alicyclophilus denitrificans* BQ1 [52] were  
302 identified in several BP8 genomes (Table 1). However, only in *Paracoccus* sp. BP8 a  
303 gene cluster (RQP05666.1-RQP05671.1) comparable to the BQ1 *nmp* cluster was  
304 identified. *Isopropanol degradation.* Genes encoding proteins with significant similarity  
305 to NAD<sup>+</sup>-dependent secondary ADH with capability to oxidize IP to acetone were  
306 identified in the BP8 metagenome [49], but not the genes encoding the enzymes for the  
307 oxidative transformation of acetone. However, the three genes encoding acetone

308 carboxylase, that transforms acetone into acetoacetate, were identified, as well as the  
309 enzymes that convert acetoacetate into acetoacetyl-CoA and this to acetyl-CoA are also  
310 encoded in the BP8 metagenome (Figure 4a, Table 1). *Glycol ethers degradation*. In  
311 the BP8 metagenome, homologous genes to PEG-degrading ADHs and ALDHs [50, 51],  
312 and diverse enzymes that could attack the ether bonds, such as glycolate oxidase  
313 (RQP04511.1, RQP04512.1, RQP04513.1, RQP11464.1, RQP19624.1, RQP19625.1,  
314 RQP16322.1, RQP16256.1), dye decoloring peroxidase (RQP04907.1, RQP09154.1)  
315 and superoxide dismutase (RQP04715.1, RQP13424.1, RQP09887.1, RQP11889.1,  
316 RQP18047.1, RQP18034.1, RQP09190.1, RQP20377.1), as well as genes encoding  
317 enzymes involved in glutathione metabolism, which have been proposed to participate in  
318 PEG metabolism [53] were identified (Figure 4b, Table 1).

### 319 **BP8 community phenotypic potential to degrade polyurethane**

320 Genes encoding PU-esterases verified for PU degradation [54-57] and confirmed  
321 carbamate-hydrolyzing enzymes *i.e.* arylamidase A [58], amidase [59], urethanase [60,  
322 61], and carbaryl hydrolase [62], were searched by standalone BLASTP analyses. Six  
323 and five sequences with similarity to PU-esterases and carbamate hydrolases were  
324 retrieved from the BP8 metagenome, respectively (Table 2). We also identified genes  
325 encoding ureases (EC3.5.1.5), suggested to act on PU degradation [63], in  
326 *Parapedobacter* sp. BP8 (RQP19536.1, RQP19537.1 RQP19538.1) and *O. intermedium*  
327 BP8.5 (RQP17756.1, RQP17448.1, RQP17449.1, RQP17450.1) genomes.

### 328 **Discussion**

329 To elucidate the mechanisms that landfill microbial communities perform to degrade the  
330 recalcitrant PE-PU plastic, here we studied the degradative activity of the BP8 microbial  
331 community that was selected because of its capability to grow in PolyLack<sup>®</sup>, a WPUD that

332 contains a proprietary PE-PU-A copolymer and several xenobiotic additives (NMP, IP, 2-  
333 BE, DPGB and DPGM). Chemical and physical analyses demonstrated that BP8  
334 consumes the additives and breaks the copolymer whereas Hi-C based metagenomic  
335 analysis allowed us to unveil the phenotypic potential to degrade PU and xenobiotics of  
336 five deconvoluted genomes from the community. The diauxic growth of BP8 observed  
337 during 25 days of cultivation in MM-PolyLack suggested that two different metabolic  
338 processes were involved in degrading the components of the WPUD. We hypothesized  
339 that the additives were consumed during the first phase whereas the copolymer was  
340 broken during the second one. However, the biomass increment and the carbon  
341 decrease observed in the first growth phase (Figure 1a) resulted not only from additive  
342 consumption, but also from the copolymer breakdown (Figures 2, 3, S2, Tables S1, S2).  
343 These observations indicate that the diauxic growth is the result of simultaneous  
344 degradation of additives and copolymer and that microbial enrichment could have  
345 selected a more effective PU-degrading community that accounts for the second  
346 exponential growth phase. Further studies to demonstrate this possibility are being  
347 undertaken.

348 Exploring the BP8 metagenome, genes encoding enzymes presumably involved in  
349 the degradation of the PolyLack® additives were identified in several of the deconvoluted  
350 genomes. Genes for NMP degradation, similar to the ones reported for *A. denitrificans*  
351 BQ1 [52] were identified in the *Paracoccus* sp. BP8 genome. *Paracoccus* strains able to  
352 utilize NMP as carbon source have been reported [64], but the genes sustaining this  
353 capability have not been described. IP biodegradation occurs by oxidative pathways in *P.*  
354 *denitrificans* GH3 and *Gordonia* sp. TY-5. In these strains, IP is transformed by NAD<sup>+</sup>-  
355 dependent secondary ADH into acetone that is oxidized by a specific monooxygenase to



356 produce methyl acetate, which is transformed to acetic acid and methanol [49, 65].  
357 However, the enzymes for metabolizing acetone by these reactions are not encoded in  
358 the BP8 metagenome. Instead, genes encoding enzymes for acetone carboxylation, to  
359 produce acetoacetate (acetone carboxylase), and for its subsequent transformation to  
360 acetoacetyl-CoA by 3-oxoacid-CoA transferase and thereafter to acetyl-CoA by acetyl-  
361 CoA C-acetyltransferase [66] were identified (Figure 4a, Table 1). The possibility that IP  
362 degradation occurs by transformation to acetyl-CoA, via acetone in BP8 is supported by  
363 the observation that in the *Paracoccus* sp. BP8 genome, a gene encoding an ADH  
364 (RQP05888.1), homologous to the *Gordonia* sp. TY-5 *adh2*, and genes encoding the  
365 acetone carboxylase subunits (RQP05866.1, RQP05867.1, RQP05889.1) are  
366 contiguously located. Adjacent to these genes, a sequence encoding a sigma-54-  
367 dependent transcriptional regulator (RQP05868.1) was observed, suggesting an operon-  
368 like organization. This presumptive IP degradative operon has not been described in any  
369 other bacteria. Degradation of 2-BE, DPGM and DPGB, the glycol ethers present in  
370 PolyLack<sup>®</sup>, has not been reported in bacteria. Degradation pathways for PEG and PPG  
371 reported in *Sphingomonads* species and *Microbacterium* (formerly *Corynebacterium*) sp.  
372 No. 7 [5, 67, 68-70] show similar reactions where the glycols' hydroxyl terminal groups  
373 are sequentially oxidized by specific ADHs and ALDHs to produce aldehydes, and  
374 thereafter carboxylic acids [50,51], suggesting a widespread strategy for glycol ethers  
375 metabolism in prokaryotes. Nevertheless, few enzymes involved in scission of ether  
376 bonds, present in these compounds, have been identified in bacteria. A glycolic acid  
377 oxidase [71] and a glycolic acid dehydrogenase [72] have been reported acting on PEG,  
378 although several other enzymes such as superoxide dismutase, monooxygenase, ether  
379 hydrolase, carbon-oxygen lyase, peroxidase and laccase have been suggested [5].



380 Homolog genes for specific ADHs and ALDHs were identified in the *Paracoccus* sp. BP8  
381 genome (Table 1). Therefore, we hypothesize that 2-BE can be oxidized to 2-  
382 butoxyacetic acid, DPGM to 2-methoxypropionic acid, which has been reported as a  
383 metabolite in the degradation of DPGM by rats [73], and DPGB to 2-butoxypropionic acid  
384 (Figure 4b). In *Paracoccus* sp. BP8, and in other genomes of the BP8 community, genes  
385 encoding glycolate oxidase, dye decoloring peroxidase, 4-methoxybenzoate  
386 monooxygenase and unspecific monooxygenase, which could account for the ether  
387 scission of the aforementioned carboxylic acids, were identified (Table 1). The cleavage  
388 of the carboxylates produced by ALDHs would generate the metabolizable intermediaries  
389 glyoxylate, butyraldehyde, propylene glycol and formaldehyde (Figure 4b). Glyoxylate can  
390 be funneled to the glyoxylate metabolism, butyraldehyde to the butanoate metabolism,  
391 propylene glycol to the pyruvate metabolism, by lactaldehyde and lactate  
392 dehydrogenases as suggested in *P. yeai* TT13 [74], and formaldehyde can be channeled  
393 to the formate metabolism where glutathione-dependent enzymes could oxidize it to  
394 formate and thereafter to CO<sub>2</sub> (Figure 4b, Table 1). All the enzymes for the aforesaid  
395 metabolic pathways are encoded in the BP8 metagenome. Additionally, in PEG  
396 metabolism, long chains of PEG-carboxylate can be processed by acyl-CoA synthetase  
397 and glutathione-S transferase forming glutathione-conjugates [53]. Although these  
398 reactions would not be needed for glycol ethers catabolism, they could be required for the  
399 degradation of long polypropylene glycol moieties that are part of the PE-PU-A copolymer  
400 (Figure S1).

401 By using different analytical techniques, we demonstrate that the BP8 community  
402 attacks the main functional groups of the PE-PU-A copolymer; from the more  
403 enzymatically susceptible ester bonds, present in acrylate and carbamate, to the more

404 recalcitrant C-C from aliphatics and aromatics, C-N from urethane, and C-O-C from ether  
405 bonds of polypropylene glycol (Figures S1, 2, 3). The changes in the chemical and  
406 physical properties of the polymer when incubated with BP8, and the generation of  
407 diverse degradation products, some of them potential metabolic intermediates in the  
408 degradation process, are evidences of the BP8's degradative capability, which is  
409 sustained by the diverse xenobiotic degrading enzymes encoded in its metagenome  
410 (Table 1). Some of the biodegradation products (Figure 2) seem to be the result of  
411 oxidative reactions on C-C bonds flanking TDI, MDI or the acrylates' styrene ring (Figure  
412 3, S1), generating aromatic compounds containing hydroxyl, aldehydes or organic acids.  
413 Additionally, the copolymer aromatic compounds could be destabilized by  
414 monooxygenases, which introduces hydroxyl groups to the aromatic rings, and by  
415 dioxygenases that catalyzes reductive dihydroxylation, generating central intermediates  
416 that can be cleaved by dearomatizing dioxygenases producing carboxylic acids [75, 76].  
417 The enzymes for the complete benzoate metabolism are encoded in the BP8  
418 metagenome and could account for PE-PU-A aromatic rings catabolism (Table 1).  
419 Aliphatic chains from acrylates and polypropylene glycols can be metabolized by alkane  
420 1-monooxygenases, that activate aliphatic chains by terminal or subterminal oxidations  
421 and by the activities of ADH and ALDH, generating compounds that can be channeled by  
422 beta-oxidation into the fatty acids metabolism (Table 1). If terminal oxidations are  
423 introduced, primary alcohols are generated and transformed into aldehydes, carboxylic  
424 acids and acyl-CoA. If subterminal oxidations of aliphatic chains occur, secondary  
425 alcohols are formed, which upon breakdown, will produce ketones and thereafter esters,  
426 which are hydrolyzed to alcohol and organic acids [77, 78]. Many different esters  
427 compounds were identified in the BP8's degradation products, suggesting that

428 subterminal oxidation of alkanes could be an important route in PU metabolism (Figures  
429 2, 3, S1). The cleavage of ester bonds by PU-esterases would produce alcohols and  
430 organic acids, and the cleavage of urethane groups by carbamate-hydrolases would  
431 produce nitrogen-containing compounds and aromatic isocyanate derivatives. As we  
432 detected these degradation products by GC-MS analysis (Table 1, 2, Figure 2),  
433 hydrolysis of ester and urethane bonds are accomplished during PE-PU-A degradation by  
434 BP8. The identification of several PU-esterases and carbamate hydrolases encoded in  
435 most of the BP8 genomes support this conclusion (Table 2).

436 The metabolic reactions proposed for the degradation of the additives and the PE-  
437 PU-A copolymer present in PolyLack<sup>®</sup> by the BP8 community are based on the  
438 phenotypic potential encoded in its metagenome. The use of proximity ligation Hi-C  
439 technology allowed to define, with high confidence, what genes belong to each of the  
440 different species of BP8 (Table 1). In this community, xenobiotic degradation is a niche  
441 dominated by *Paracoccus* sp. BP8 and *Ochrobactrum intermedium* BP8.5, in whose  
442 genomes, key enzymes for different steps of biodegradation are widely represented  
443 (Table 1), which must be the reason for their preponderance in the BP8 community. In  
444 addition, Microbacteriaceae bacterium BP8.4 genome encodes enzymes for the  
445 metabolism of aromatic compounds suggesting that metacleavage ring excision and  
446 muconate lactone formation might be functional. On the other hand, *Chryseobacterium*  
447 sp. BP8.2 and *Parapedobacter* sp. BP8.3 genomes, harbor genes encoding  
448 complementary metabolic activities for alkanes oxidation, such as hydrolysis and  
449 oxidation of linear intermediates. The finding of such a diverse genetic repertoire in the  
450 BP8 metagenome suggests a remarkable metabolic versatility, with strong hydrolytic and  
451 oxidative capabilities that can play significant roles in the degradation of diverse

452 environmental contaminants. The abundance and distribution of these catabolic enzymes  
453 among the different members of the BP8 community, suggest syntrophic mechanisms  
454 driving community behavior. However, incomplete genome reconstruction in the  
455 deconvolution analysis, resulting in potential pathway gaps in certain genomes, cannot be  
456 ruled out, nor can the collapsing of multiple strains into a single cluster. On the other  
457 hand, although *Paracoccus* and *Ochrobactrum* are predominant in the BP8 community by  
458 far, we cannot discard that specific enzymatic activities encoded in genomes of little  
459 abundant species can be crucial for the successful performance of BP8.

460 The present work provides deep understanding of the microbial ecology of a  
461 selected landfill microbial community capable of PU and xenobiotics degradation by  
462 revealing its composition and its outstanding phenotypic potential observed in the  
463 catalytic capabilities that its members could display to cleave different recalcitrant  
464 functional groups. Altogether, these features place BP8 community as a quite promising  
465 source for developing environmental biotechnology strategies contributing to mitigate  
466 anthropogenic plastics and xenobiotics pollution for achieving better environmental  
467 quality. Moreover, further exploration of individual species of the community will allow the  
468 manipulation of novel catabolic capabilities in order to improve biodegradative  
469 technological processes.

#### 470 **Acknowledgements**

471 IG and MB acknowledge Consejo Nacional de Ciencia y Tecnología for their Ph.D.  
472 scholarships. ASR acknowledges Dirección General de Asuntos del Personal  
473 Académico, UNAM, for his scholarship for a posdoctoral position at Facultad de Química,  
474 UNAM. We thank USAII-FQ analytical support provided by Ch. Marisela Gutiérrez  
475 Franco, Ch. Rafael Iván Puente Lee, Ch. Víctor Hugo Lemus and Ch. Elvira del Socorro

476 Reynosa in the FTIR, SEM, carbon quantification, and thermogravimetry analyses,  
477 respectively. The technical support of MSc. Fernando de Jesús Rosas Ramírez in the  
478 use of the GC-MS equipment is appreciated. Also, we are grateful to Gerardo Cedillo,  
479 Salvador López and Karla E. Reyes from Institute of Materials Research (IIM-UNAM) for  
480 their assistance in NMR, GPC and DSC analyses, respectively, and to Taylor Reiter and  
481 C. Titus Brown for help with metagenomic analysis.

#### 482 **Funding information**

483 This work was funded by Programa de Apoyo a Proyectos de Investigación e Innovación  
484 Tecnológica, Dirección General de Asuntos del Personal Académico, Universidad  
485 Nacional Autónoma de México grants IN217114 and IN223317, and Programa de Apoyo  
486 a la Investigación y el Posgrado, Facultad de Química, Universidad Nacional Autónoma  
487 de México, grant 5000-9117. IL, MP, and SS were supported in part by NIAID grant  
488 2R44AI122654-02A1.

#### 489 **Conflict of interest statement**

490 IL, MP, and SS are employees and shareholders of Phase Genomics, a company  
491 commercializing proximity ligation technology.

#### 492 **References**

- 493 1. Zalasiewicz J, Waters CN, Ivar do Sul JA, Corcoran PL, Barnosky AD, Cearreta A,  
494 Edgeworth M, Gałuszka A, Jeandel C, Leinfelder R, McNeill JR, Steffen W,  
495 Summerhayes C, Wapreisch M, Williams M, Wolfe AP, Yonan Y. The geological cycle of  
496 plastics and their use as a stratigraphic indicator of the Anthropocene. *Anthropocene*,  
497 2016; 13: 4-17.

- 498 2. Plastics Europe. Plastics – the Facts 2018. An analysis of European plastics production,  
499 demand and waste data. Association of Plastics Manufacturers.  
500 <http://www.plasticseurope.org> 2018.
- 501 3. Cornille A, Auvergne R, Figovsky O, Boutevin B, Caillol S. A perspective approach to  
502 sustainable routes for non-isocyanate polyurethanes. *Eur. Polym. J.* 2017; 87:535–52.
- 503 4. Furtwenglera P, Perrin R, Redl A, Avérous L. Synthesis and characterization of  
504 polyurethane foams derived of fully renewable polyester polyols from sorbitol. *Eur. Polym.*  
505 *J.* 2017; 97:319–27.
- 506 5. Kawai F. The biochemistry and molecular biology of xenobiotic polymer degradation by  
507 microorganisms. *Biosci Biotechnol Biochem.* 2010; 74:1743-59.
- 508 6. Malla MA, Dubey A, Yadav S, Kumar A, Hashem A, Abd Allah EF. Understanding and  
509 designing the strategies for the microbe-mediated remediation of environmental  
510 contaminants using omics approaches. *Front Microbiol.* 2018; 9:1132.
- 511 7. Varsha YM, Naga Deepthi CH, Chenna S. An emphasis on xenobiotic degradation in  
512 environmental clean up. *J Bioremed Biodegradad.* 2011; S11:001.
- 513 8. Organization for Economic Co-operation and Development. SIDS Initial Assessment  
514 Report For SIAM 17. Propylene glycol ethers. UNEP Publications. 2003.
- 515 9. Cregut M, Bedas M, Durand MJ, Thouand G. New insights into polyurethane  
516 biodegradation and realistic prospects for the development of a sustainable waste  
517 recycling process. *Biotechnol Adv.* 2013; 31:1634-47.
- 518 10. Nakajima-Kambe T, Onuma F, Kimpara N, Nakahara T. Isolation and characterization of  
519 a bacterium which utilizes polyester polyurethane as a sole carbon and nitrogen source.  
520 *FEMS Microbiol Lett.* 1995; 129:39-42.
- 521 11. Osman M, Satti SM, Luqman A, Hasan F, Shah Z, Shah A. Degradation of polyester

- 522 polyurethane by *Aspergillus* sp. strain S45 isolated from soil. J Polym Environ. 2018;  
523 26:301-10.
- 524 12. Ocegüera-Cervantes A, Carrillo-García A, López N, Bolaños-Nuñez S, Cruz-Gómez MJ,  
525 Wachter C, Loza-Tavera H. Characterization of the polyurethanolytic activity of two  
526 *Alicyclophilus* sp. strains able to degrade polyurethane and N-methylpyrrolidone. Appl  
527 Environ Microbiol. 2007; 73:6214–23.
- 528 13. Gamerith C, Herrero AE, Pellis A, Ortner A, Vielnascher R, Luschnig D, Zartl B, Haernvall  
529 K, Zitzenbacher S, Strohmeier G, Hoff O, Steinkellner G, Gruber K, Ribitsch D, Guebitz  
530 GM. Improving enzymatic polyurethane hydrolysis by tuning enzyme sorption. Polym  
531 Degrad Stabi. 2016; 132: 69-77.
- 532 14. Magnin A, Pollet E, Perrin R, Ullmann Ch, Persillon C, Phalip V, Avérous L. Enzymatic  
533 recycling of thermoplastic polyurethanes: Synergistic effect of an esterase and an  
534 amidase and recovery of building blocks. Waste Management. 2019; 85:141-50.
- 535 15. Tang YW, Labow RS, Santerre JP. Isolation of methylene dianiline and aqueous-soluble  
536 biodegradation products from polycarbonate-polyurethanes. Biomaterials. 2003; 24:2805-  
537 19.
- 538 16. Howard GT. Biodegradation of polyurethane: a review. Int Biodeterior Biodegrad. 2002;  
539 49:245-52.
- 540 17. Ojo OA. Molecular strategies of microbial adaptation to xenobiotics in natural  
541 environment. Biotechnol Mol Biol Rev. 2007; 2:1-3.
- 542 18. Cosgrove L, McGeechan PL, Robson GD, Handley PS. Fungal communities associated  
543 with degradation of polyester polyurethane in soil. Appl Environ Microb. 2007; 73:5817-  
544 24.
- 545 19. Zafar U, Nzerem P, Langarica-Fuentes A, Houlden A, Heyworth A, Saiani A, Robson GD.

- 546 Biodegradation of polyester polyurethane during commercial composting and analysis of  
547 associated fungal communities. *Bioresource Technol.* 2014; 158:374-7.
- 548 20. Shah Z, Gulzar M, Hasan F, Shah AA. Degradation of polyester polyurethane by an  
549 indigenously developed consortium of *Pseudomonas* and *Bacillus* species isolated from  
550 soil. *Polym Degrad Stabil.* 2016; 134:349-56.
- 551 21. Vargas-Suárez M, Fernández-Cruz V, Loza-Tavera H. Biodegradation of polyacrylic and  
552 polyester polyurethane coatings by enriched microbial communities. *Appl Microbiol*  
553 *Biotechnol.* 2019; 103:3225-36.
- 554 22. Bustard MT, Meeyoo V, Wright P. Biodegradation of isopropanol in a three phase fixed  
555 bed bioreactor: start up and acclimation using a previously-enriched microbial culture.  
556 *Environ Technol.* 2001; 22:1193-201.
- 557 23. Loh CH, Wu B, Ge L, Pan Cha, Wang R. High-strength N -methyl-2-pyrrolidone-  
558 containing process wastewater treatment using sequencing batch reactor and membrane  
559 bioreactor: A feasibility study. *Chemosphere.* 2017; 194:534-42.
- 560 24. Liu T, Ahn H, Sun W, McGuinness LR, Kerkhof LJ, Häggblom, MM. Identification of a  
561 Ruminococcaceae Species as the Methyl tert-Butyl Ether (MTBE) Degrading Bacterium  
562 in a Methanogenic Consortium. *Environ Sci Technol.* 2016; 50:1455-64.
- 563 25. Ferrero P, San-Valero P, Gabaldón C, Martínez-Soria V, Peña-Roja JM. Anaerobic  
564 degradation of glycol ether-ethanol mixtures using EGSB and hybrid reactors:  
565 Performance comparison and ether cleavage pathway. *J Environ Manag.* 2018; 213:159-  
566 67.
- 567 26. Burton JN, Liachko I, Dunham MJ, Shendure J. Species-level deconvolution of  
568 metagenome assemblies with Hi-C-based contact probability maps. *G3-Genes Genom*  
569 *Genet.* 2014; 4:1339-46.



- 570 27. Press MO, Wisner AH, Kronenberg ZN, Langford KW, Shakya M, Lo C-C, Mueller KA,  
571 Sullivan ST, Chain PSG, Liachko I. Hi-C deconvolution of a human gut microbiome yields  
572 high-quality draft genomes and reveals plasmid-genome interactions. *bioRxiv* 2017;  
573 198713.
- 574 28. Wu Y-W, Tang Y-H, Tringe SG, Simmons BA, Singer SW. MaxBin: an automated binning  
575 method to recover individual genomes from metagenomes using an expectation-  
576 maximization algorithm. *Microbiome*. 2014; 2:26.
- 577 29. Breitwieser FP, Perteza M, Zimin AV, Salzberg SL. Human contamination in bacterial  
578 genomes has created thousands of spurious proteins. *Genome Res*. 2019; 29:954-60.
- 579 30. Shaiber A, Eren AM. Composite metagenome-assembled genomes reduce the quality of  
580 public genome repositories. *mBio*. 2019; 10:e00725-19.
- 581 31. SayerLack. Poly Lack Aqua Mate UB-0810. Manual Técnico. 2013.  
582 [http://www.gruposayer.com//web/uploads/file/TDS\\_UB-0810-file160515563.pdf](http://www.gruposayer.com//web/uploads/file/TDS_UB-0810-file160515563.pdf)
- 583 32. Gaytán I, Mejía MA, Hernández-Gama R, Torres LG, Escalante CA, Muñoz-Colunga A.  
584 Effects of indigenous microbial consortia for enhanced oil recovery in a fragmented  
585 calcite rocks system. *J Petrol Sci Eng*. 2015; 128:65-72.
- 586 33. Nurk S, Meleshko D, Korobeynikov A, Pevzner PA. metaSPAdes: a new versatile  
587 metagenomic assembler. *Genome Res*. 2017; 27:824-34.
- 588 34. Li H, Durbin R. Fast and accurate long-read alignment with Burrows–Wheeler transform.  
589 *Bioinformatics*. 2010; 26:589-95.
- 590 35. Segata N, Waldron L, Ballarini A, Narasimhan V, Jousson O, Huttenhower, C.  
591 Metagenomic microbial community profiling using unique clade-specific marker genes.  
592 *Nature Methods*. 2012; 9:811-4.
- 593 36. Parks DH, Imelfort M, Skennerton CT, Hugenholtz P, Tyson GW. CheckM: Assessing the

- 594 quality of microbial genomes recovered from isolates, single cells, and metagenomes.  
595 Genome Res. 2015; 25:1043-55.
- 596 37. Lefort V, Longueville JE, Gascuel O. SMS: Smart Model Selection in PhyML. Mol Biol  
597 Evol. 2017; 34:2422-4.
- 598 38. Gouy M, Guindon S, Gascuel O. SeaView version 4: A multiplatform graphical user  
599 interface for sequence alignment and phylogenetic tree building. Mol Biol Evol. 2010;  
600 27:221-4.
- 601 39. Yoon S-H, Ha S, Lim J, Kwon S, Chun J. A large-scale evaluation of algorithms to  
602 calculate average nucleotide identity. Antonie Van Leeuwenhoek. 2017; 110:1281-6.
- 603 40. Zhu W, Lomsadze A, Borodovsky M. Ab initio gene identification in metagenomic  
604 sequences. Nucleic Acids Res. 2010; 38:e132.
- 605 41. Kanehisa M, Sato Y, Morishima K. BlastKOALA and GhostKOALA: KEGG Tools for  
606 functional characterization of genome and metagenome sequences. J Mol Biol. 2016;  
607 428:726-31.
- 608 42. Stelmack PL, Gray MR, Pickard MA. Bacterial adhesion to soil contaminants in the  
609 presence of surfactants. Appl Environ Microbiol. 1999; 65:163-8.
- 610 43. Wick L, Ruiz de Munain A, Springael D, Harms H. Responses of *Mycobacterium* sp.  
611 LB501T to the low bioavailability of solid anthracene. Appl Microbiol Biotechnol. 2002;  
612 8:378-85.
- 613 44. Gite VV, Mahulikar PP, Hundiwale DG. Preparation and properties of polyurethane  
614 coatings based on acrylic polyols and trimer of isophorone diisocyanate. Prog Org Coat.  
615 2010; 68:307-12.
- 616 45. Maurya SD, Kurmvanshi SK, Mohanty S, Nayak SK. A review on acrylate-terminated  
617 urethane oligomers and polymers: synthesis and applications. Polym Plast Technol Eng.

- 618 2018; 57:625-56.
- 619 46. Pardini OR, Amalvy JI. FTIR, <sup>1</sup>H-NMR spectra, and thermal characterization of water-  
620 based polyurethane/acrylic hybrids. *J Appl Polym Sci.* 2008; 107:1207-14.
- 621 47. Cipriani E, Bracco P, Kurtz SM, Costa L, Zanetti M. In-vivo degradation of  
622 poly(carbonate-urethane) based spine implants. *Polym Degrad Stabil.* 2013; 98:1225-35.
- 623 48. Sultan M, Islam A, Gull N, Bhatti H, Safa Y. Structural variation in soft segment of  
624 waterborne polyurethane acrylate nanoemulsions. *J Appl Polym Sci.* 2014; 132:41706.
- 625 49. Kotani T, Yamamoto T, Yurimoto H, Sakai Y, Kato, N. Propane monooxygenase and  
626 NAD<sup>+</sup>-dependent secondary alcohol dehydrogenase in propane metabolism by *Gordonia*  
627 sp. strain TY-5. *J Bacteriol.* 2003; 185:7120-8.
- 628 50. Tani A, Charoenpanich J, Mori T, Takeichi M, Kimbara K, Kawai F. Structure and  
629 conservation of a polyethylene glycol-degradative operon in sphingomonads.  
630 *Microbiology.* 2007; 153:338-46.
- 631 51. Ohta T, Kawabata T, Nishikawa K, Tani A, Kimbara K, Kawai F. Analysis of amino acid  
632 residues involved in catalysis of polyethylene glycol dehydrogenase from *Sphingopyxis*  
633 *terrae*, using three-dimensional molecular modeling-based kinetic characterization of  
634 mutants. *Appl Environ Microbiol.* 2006; 72:4388-96.
- 635 52. Solís-González CJ, Domínguez-Malfavón L, Vargas-Suárez M, Gaytán I, Cevallos MA,  
636 Lozano L, Cruz-Gómez MJ, Loza-Tavera H. Novel metabolic pathway for *N*-  
637 methylpyrrolidone degradation in *Alicyclophilus* sp. BQ1. *Appl Environ Microbiol.* 2018;  
638 84:pii: e02136-17.
- 639 53. Somyoonsap P, Tani A, Charoenpanich J, Minami T, Kimbara K, Kawai F. Involvement of  
640 PEG-carboxylate dehydrogenase and glutathione S-transferase in PEG metabolism by  
641 *Sphingopyxis macrogoltabida* strain 103. *Appl Microbiol Biotechnol.* 2008; 81:473-84.

- 642 54. Nomura N, Shigeno-Akutsu Y, Nakajima-Kambe T, Nakahara T. Cloning and sequence  
643 analysis of a polyurethane esterase of *Comamonas acidovorans* TB-35. J Ferment  
644 Bioeng. 1998; 86:339-45.
- 645 55. Stern RV, Howard GT. The polyester polyurethanase gene (*pueA*) from *Pseudomonas*  
646 *chlororaphis* encodes a lipase. FEMS Microbiol Lett. 2000; 185:163-8.
- 647 56. Howard GT, Crother B, Vicknair J. Cloning, nucleotide sequencing and characterization  
648 of a polyurethanase gene (*pueB*) from *Pseudomonas chlororaphis*. Int Biodeterior  
649 Biodegradation. 2001; 47:141-9.
- 650 57. Ufarté L, Laville E, Duquesne S, Morgavi D, Robe P, Klopp C, Rizzo A, Pizzut-Serin S,  
651 Potocki-Veronese G. Discovery of carbamate degrading enzymes by functional  
652 metagenomics. PLoS One. 2017; 12:1-21.
- 653 58. Zhang J, Yin J-G, Hang B-J, Cai S, He J, Zhou S-G, Li S-P. Cloning of a novel  
654 arylamidase gene from *Paracoccus* sp. strain FLN-7 that hydrolyzes amide pesticides.  
655 Appl Environ Microbiol. 2012; 78:4848-55.
- 656 59. Yun H, Liang B, Qiu J, Zhang L, Zhao Y, Jiang J, Wang A. Functional characterization of  
657 a novel amidase involved in biotransformation of triclocarban and its dehalogenated  
658 congeners in *Ochrobactrum* sp. TCC-2. Environ Sci Technol. 2016; 51:291-300.
- 659 60. Toshiaki K, Yukie S. Novel urethanase gene. Japan Science and Technology Agency.  
660 2005; <http://europepmc.org/patents/PAT/WO2006019095> (17.11.17).
- 661 61. Liu X, Fang F, Xia X, Du G, Chen J. Stability enhancement of urethanase from  
662 *Lysinibacillus fusiformis* by site-directed mutagenesis. Sheng Wu Gong Cheng Xue Bao.  
663 2016; 32:1233-42.
- 664 62. Hashimoto M, Mizutani A, Tago K, Ohnishi-Kameyama M, Shimojo T, Hayatsu M.  
665 Cloning and nucleotide sequence of carbaryl hydrolase gene (*cahA*) from *Arthrobacter*

- 666 sp. RC100. J Biosci Bioeng. 2006; 101:410-14.
- 667 63. Yang Y, Kang Z, Zhou J, Chen J, Du G. High-level expression and characterization of  
668 recombinant acid urease for enzymatic degradation of urea in rice wine. Appl Microbiol  
669 Biotechnol. 2015; 99:301-08.
- 670 64. Cai S, Cai T, Liu S, Yang Q, He J, Chen L, Hu J. Biodegradation of N-methylpyrrolidone  
671 by *Paracoccus* sp. NMD-4 and its degradation pathway. Int Biodeterior Biodegradation  
672 2014; 93:70–7.
- 673 65. Geng Y, Deng Y, Chen F, Jin H, Tao K, Hou T. Biodegradation of isopropanol by a  
674 solvent-tolerant *Paracoccus denitrificans* strain. Prep Biochem Biotechnol. 2015;  
675 45:4919.
- 676 66. Schühle K, Heider J. Acetone and butanone metabolism of the denitrifying bacterium  
677 *Aromatoleum aromaticum* demonstrates novel biochemical properties of an ATP-  
678 dependent aliphatic ketone carboxylase. J Bact. 2012; 194:131-41.
- 679 67. Tachibana S, Kawai F, Yasuda M. Heterogeneity of dehydrogenases of  
680 *Stenotrophomonas maltophilia* showing dye-linked activity with polypropylene glycols.  
681 Biosci Biotechnol Biochem. 2002; 66:737-42.
- 682 68. Kawai, F. Microbial degradation of polyethers. Appl Microbiol Biotechnol. 2002; 58:30-8.
- 683 69. Hu X, Liu X, Tani A, Kimbara K, Kawai F. Proposed oxidative metabolic pathway for  
684 polypropylene glycol in *Sphingobium* sp. Strain PW-1. Biosci Biotechnol Biochem. 2008;  
685 72:1115-18.
- 686 70. Ohtsubo Y, Nagata Y, Numata M, Tsuchikane K, Hosoyama A, Yamazoe A, Tsuda M,  
687 Fujita N, Kawai F. Complete genome sequence of a polypropylene glycol-degrading  
688 strain, *Microbacterium* sp. No. 7. Genome Announc. 2015; 3:e01400-15,
- 689 71. Yamanaka H, Kawai F. 1991. Purification and characterization of a glycolic acid (GA)

- 690 oxidase active toward diglycolic acid (DGA) produced by DGA-utilizing *Rhodococcus* sp.  
691 No. 432. J Ferment Bioeng. 1991; 7:83-8.
- 692 72. Enokibara S, Kawai F. 1997. Purification and characterization of an ether bond-cleaving  
693 enzyme involved in the metabolism of polyethylene glycol. J Ferment Bioeng. 1997;  
694 83:549-54.
- 695 73. Miller RR, Langvardt PW, Calhoun LL, Yahrmak MA. Metabolism and disposition of  
696 propylene glycol monomethyl ether (PGME) beta isomer in male rats. Toxicol Appl  
697 Pharmacol. 1986; 83:170-7.
- 698 74. Lim JY, Hwang I, Ganzorig M, Pokhriyal S, Singh R., Lee K. Complete genome sequence  
699 of *Paracoccus yeei* TT13, isolated from human skin. Genome Announc. 2018; 6:e01514-  
700 17.
- 701 75. Seo JS, Keum Y-S, Li QX. Bacterial degradation of aromatic compounds. Int J Environ  
702 Res Public Health. 2009; 6:278-309.
- 703 76. Ladino-Orzuela G, Gomes E, da Silva R, Salt C, Parsons JR. Metabolic pathways for  
704 degradation of aromatic hydrocarbons by bacteria. Rev Environ Contamination Toxicol.  
705 2016; 237,doi10.1007/978-3-319-23573-8\_5
- 706 77. Rojo F. Degradation of alkanes by bacteria. Environment Microbiol. 2009; 11:2477-90.
- 707 78. Wentzel A, Ellingsen TE, Kotlar HK, Zotchev SB, Throne-Holst M. Bacterial metabolism  
708 of long-chain *n*-alkanes. Appl Microbiol Biotechnol. 2007; 76:1209-21.

**Table 1. Distribution of genes encoding relevant proteins involved in xenobiotics degradation in the BP8 metagenome.**

| Activity                                         | K Number | EC         | Name             | <i>Paracoccus</i><br>sp. BP8 | <i>Chryseobacterium</i><br>sp. BP8.2 | <i>Parapedobacter</i><br>sp. BP8.3 | Microbacteriaceae<br>bacterium BP8.4 | <i>O. intermedium</i><br>BP8.5 |
|--------------------------------------------------|----------|------------|------------------|------------------------------|--------------------------------------|------------------------------------|--------------------------------------|--------------------------------|
| <b>Benzoate and related compounds metabolism</b> |          |            |                  |                              |                                      |                                    |                                      |                                |
| Benzoate/toluate 1,2-dioxygenase                 | K05549   | 1.14.12.10 | <i>benA-xylX</i> | 1                            |                                      |                                    |                                      |                                |
|                                                  | K05550   |            | <i>benB-xylY</i> | 1                            | -                                    | -                                  | -                                    |                                |
|                                                  | K05784   |            | 1.18.1.-         | <i>benC-xylZ</i>             | 1                                    |                                    |                                      |                                |
| Dihydroxyclohexadiene carboxylate dehydrogenase  | K05783   | 1.3.1.25   | <i>benD-xylL</i> | 1                            | -                                    | -                                  | -                                    | -                              |
| p-Hydroxybenzoate 3-monooxygenase                | K00481   | 1.14.13.2  | <i>pobA</i>      | 1                            | -                                    | -                                  | -                                    | 1                              |
| Catechol 1,2-dioxygenase                         | K03381   | 1.13.11.1  | <i>catA</i>      | 1                            | -                                    | -                                  | -                                    | -                              |
| Catechol 2,3-dioxygenase                         | K07104   | 1.13.11.2  | <i>catE</i>      | 1                            | -                                    | -                                  | 1                                    | 1                              |
| Protocatechuate 3,4-dioxygenase                  | K00448   | 1.13.11.3  | <i>pcaG-pcaH</i> | 1                            | -                                    | -                                  | -                                    | 1                              |
|                                                  | K00449   |            |                  | 1                            | -                                    | -                                  | -                                    | 1                              |
| Muconate cycloisomerase                          | K01856   | 5.5.1.1    | <i>catB</i>      | 1                            | -                                    | -                                  | 1                                    | -                              |
| 3-Carboxy-cis,cis-muconate cycloisomerase        | K01857   | 5.5.1.2    | <i>pcaB</i>      | 1                            | -                                    | -                                  | -                                    | 1                              |
| Muconolactone isomerase                          | K01856   | 5.3.3.4    | <i>catC</i>      | 1                            | -                                    | -                                  | -                                    | -                              |
| 4-Carboxymuconolactone decarboxylase             | K01607   | 4.1.1.44   | <i>pcaC</i>      | 2                            | -                                    | -                                  | -                                    | 1                              |
| Enol-lactone hydrolase                           | K01055   | 3.1.1.24   | <i>pcaD</i>      | 3                            | -                                    | -                                  | -                                    | 1                              |
| β-ketoadipate:succinyl-CoA transferase,          | K01031   | 2.8.3.6    | <i>pcaI-pcaJ</i> | 1                            | -                                    | -                                  | -                                    | 2                              |
|                                                  | K01032   |            |                  | 1                            | -                                    | -                                  | -                                    | 1                              |
| β-ketoadipyl-CoA thiolase                        | K00632   | 2.3.1.16   | <i>pcaF</i>      | -                            | 1                                    | 1                                  | 1                                    | 1                              |
| 2-Oxopent-4-enoate hydratase (benzoate)          | K02554   | 4.2.1.80   | <i>mhpD</i>      | -                            | -                                    | -                                  | 1                                    | -                              |
| 4-Hydroxy 2-oxovalerate aldolase                 | K01666   | 4.1.3.39   | <i>mhpE</i>      | -                            | -                                    | -                                  | 2                                    | -                              |
| Acetaldehyde dehydrogenase                       | K04073   | 1.2.1.10   | <i>mhpF</i>      | -                            | -                                    | -                                  | 2                                    | -                              |
| 4-Methoxybenzoate monooxygenase (O-              | K22553   | 1.14.99.15 | CYP199A2         | 1                            | -                                    | -                                  | -                                    | -                              |

|                                    |        |            |             |   |   |   |   |   |
|------------------------------------|--------|------------|-------------|---|---|---|---|---|
| demethylating)                     |        |            |             |   |   |   |   |   |
| Carboxymethylene butanolidase      | K01061 | 3.1.1.45   | <i>clcD</i> | - | - | - | 1 | 1 |
| 4-Hydroxybenzoate decarboxylase    | K03186 | 4.1.1.61   | <i>ubiX</i> | 2 | - | 1 | - | 1 |
| Amidase                            | K01426 | 3.5.1.4    | <i>amiE</i> | 1 | - | - | 1 | 1 |
| Benzoyl phosphate phosphohydrolase | K01512 | 3.6.1.7    | <i>acyP</i> | - | - | 1 | 1 | - |
| 2,4-Dichlorophenol 6-monooxygenase | K10676 | 1.14.13.20 | <i>tfdB</i> | 1 | - | - | - | - |
| 2-Haloacid dehalogenase            | K01560 | 3.8.1.2    |             | 2 | - | - | - | 1 |

#### Alkanes metabolism

|                                                     |        |            |                                |   |   |   |   |   |
|-----------------------------------------------------|--------|------------|--------------------------------|---|---|---|---|---|
| Alkane 1-monooxygenase                              | K00496 | 1.14.15.3  | <i>alkB1_B2</i><br><i>alkM</i> | 2 | - | - | - | - |
| Ferredoxin NAD reductase component                  | K00529 | 1.18.1.3   | <i>hcaD</i>                    | 2 | - | - | - | 1 |
| Unspecific monooxygenase                            | K00493 | 1.14.14.1  |                                | 2 | - | - | - | 1 |
| Long-chain-alkane monooxygenase                     | K20938 | 1.14.14.28 | <i>LadA</i>                    | - | - | - | 1 | - |
| Alcohol dehydrogenase propanol preferring           | K13953 | 1.1.1.1    | <i>adhP</i>                    | 2 | - | 1 | - | 1 |
| Aldehyde dehydrogenase (NAD <sup>+</sup> dependent) | K00128 | 1.2.1.3    | ALDH                           | 6 | 2 | - | - | 3 |
| Aldehyde dehydrogenase (NADP dependent)             | K14519 | 1.2.1.4    | <i>aldH</i>                    | - | 1 | - | - | - |
| Lipocalin family protein                            | K03098 | -          | <i>Blc</i>                     | - | 1 | 1 | - | 1 |
| Long chain fatty acid transport protein             | K06076 | -          | <i>fadL</i>                    | 1 | - | - | - | - |

#### N-methyl 2-pyrrolidone metabolism

|                                      |        |          |             |   |   |   |   |   |
|--------------------------------------|--------|----------|-------------|---|---|---|---|---|
| N-methylhydantoin amidohydrolase     | K01473 | 3.5.2.14 | <i>nmpA</i> | 5 | - | - | - | 1 |
|                                      | K01474 |          | <i>nmpB</i> | 5 | - | - | 1 | - |
| Aminoacid oxidase                    | -      | -        | <i>nmpC</i> | 3 | - | - | 2 | 1 |
| Succinate-semialdehyde dehydrogenase | K00135 | 1.2.1.16 | <i>nmpF</i> | 7 | - | 1 | 2 | 1 |

#### Isopropanol metabolism

|                                                        |        |         |             |   |   |   |   |   |
|--------------------------------------------------------|--------|---------|-------------|---|---|---|---|---|
| <sup>a</sup> Alcohol dehydrogenase propanol preferring | K13953 | 1.1.1.- | <i>adh1</i> | 1 | - | - | - | - |
|--------------------------------------------------------|--------|---------|-------------|---|---|---|---|---|



|                                                           |        |           |              |    |   |   |   |   |
|-----------------------------------------------------------|--------|-----------|--------------|----|---|---|---|---|
| Alcohol dehydrogenase                                     | K18369 | 1.1.1.-   | <i>adh2</i>  | 2  | - | - | - | - |
| <sup>b</sup> Aldehyde dehydrogenase                       | K00138 | 1.2.1.-   | <i>adh3</i>  | 1  | - | - | 1 | - |
|                                                           | K10854 |           | <i>acxB</i>  | 1  |   |   |   |   |
| Acetone carboxylase                                       | K10855 | 6.4.1.6   | <i>acxA</i>  | 1  | - | - | - | 1 |
|                                                           | K10856 |           | <i>acxC</i>  | 1  |   |   |   |   |
| 3-Oxoacid-CoA transferase                                 | K01028 | 2.8.3.5   |              | 1  | 1 | 1 | 1 | - |
|                                                           | K01029 |           |              | 1  | 1 | 1 | 1 | - |
| Acetoacetate-CoA ligase                                   | K01907 | 6.2.1.16  | <i>acsA</i>  | -  | - | - | - | 1 |
| Acetyl-CoA C-acetyltransferase                            | K00626 | 2.3.1.9   | <i>atoB</i>  | 10 | 1 | 1 | 3 | 5 |
| <b>Glycol ethers and polypropylene glycols metabolism</b> |        |           |              |    |   |   |   |   |
| <sup>c</sup> Alcohol dehydrogenase,                       | .      | 1.1.1.-   | <i>pegdh</i> | 3  | - | - | - | 3 |
| <sup>d</sup> Aldehyde dehydrogenase                       | -      | 1.2.1.3   | <i>pegC</i>  | 3  | - | - | 1 | - |
|                                                           | K00104 |           | <i>glcD</i>  | 1  | - | - | - | 2 |
| Glycolate oxidase                                         | K11472 | 1.1.3.15  | <i>glcE</i>  | 1  | - | - | - | 1 |
|                                                           | K11473 |           | <i>glcF</i>  | 1  | - | - | 1 | 1 |
| Superoxide dismutase                                      | K04564 | 1.15.1.1  | SOD2         | -  | 1 | 3 | 1 | 1 |
|                                                           | K04565 |           | SOD1         | 1  | 1 | - | - | - |
| Dye decoloring peroxidase                                 | K15733 | 1.11.1.19 | <i>DyP</i>   | 1  | - | - | 1 | - |
| Glutathione S-transferase                                 | K00799 | 2.5.1.18  | <i>gst</i>   | 11 | - | - | - | 8 |
| Acyl Co-A synthetase                                      | K01897 | 6.2.1.3   | <i>ACSL</i>  | 2  | 3 | 2 | 2 | 1 |
| S-(hydroxymethyl) glutathione dehydrogenase               | K00121 | 1.1.1.284 | <i>frmA</i>  | 3  | - | - | - | 2 |
| S-formylglutathione hydrolase                             | K01070 | 3.1.2.12  | <i>fghA</i>  | 1  | - | - | - | 1 |

<sup>a</sup> *Adh1* was identified by BLAST analysis using the *adh1* sequence (Acc. num. BAD03962.1) reported for *Gordonia* sp. TY-5 [49] as query (Query cover  $\geq$  99%; E-value  $\leq$  4E-42; Identity 34%). The gene accession number in the BP8 metagenome is RQP06405.1.

<sup>b</sup> *Adh3* genes were identified by BLAST analysis using the *adh3* sequence (Acc. num. BAD03965.1) reported for *Gordonia* sp. TY-5 [49] as query (Query cover  $\geq$  97%; E-value  $\leq$  1E-97; Identity  $\geq$  38.8%). The gene accession numbers in the BP8 metagenome are RQP06404.1 and RQP13157.1. These genes were classified as aldehyde dehydrogenases by KEGG, similarly as described in [49].

<sup>c</sup> *Pegdh* genes were identified by BLAST analysis using the polyethylene glycol dehydrogenase sequence (*pegdh*) from *Sphingophyxis terrae* (Acc. num. BAB61732) [50] as query (Query cover  $\geq$  97%; E-value  $\leq$  2.0E-122; Identity  $\geq$  38.5%). The gene accession numbers in the BP8 metagenome are RQP05609.1, RQP06903.1, RQP07092.1, RQP19606.1, RQP18819.1, RQP20974.1.

<sup>d</sup> *Pegc* genes were identified by BLAST using polyethylene glycol aldehyde dehydrogenase sequence from *Sphingophyxis macrogoltabida* (Acc. num. BAF98449.1) [50] as query (Query cover  $\geq$  98%; E-value  $\leq$  1.0E-80; Identity  $\geq$  38%; Similarity  $\geq$  56%). The gene accession numbers in the BP8 metagenome are RQP06197.1, RQP04172.1, RQP06015.1, RQP13157.1. Only RQP06197.1 was identified as K00128 by KEGG.

**Table 2. Esterases and carbamate hydrolyzing enzymes encoded in the BP8 metagenome.**

| Enzyme<br>Query Organism<br>(Accession number)                                | E.C.<br>num. | Amino<br>acids in<br>the query | Hit in the BP8<br>metagenome                          | E value/<br><sup>a</sup> Identity/<br>Similarity | Amino<br>acids in<br>the hit | Reference |
|-------------------------------------------------------------------------------|--------------|--------------------------------|-------------------------------------------------------|--------------------------------------------------|------------------------------|-----------|
| Polyurethane esterase <i>Delftia acidovorans</i> (BAA76305)                   | 3.1.1.6      | 548                            | <i>Parapedobacter</i> sp. BP8.3 (RQP17780.1)          | 1.0E-07/<br>32%/ 48%                             | 640                          | [53]      |
| Polyurethanase esterase A<br><i>Pseudomonas chlororaphis</i><br>(AAD22743)    | 3.1.1.-      | 617                            | <i>Paracoccus</i> sp. BP8 (RQP07762.1)                | 4.0E-16/<br>34%/ 50%                             | 783                          | [54]      |
|                                                                               |              |                                | <i>Paracoccus</i> sp. BP8 (RQP06646.1)                | 2.0E-14/<br>33%/ 46%                             | 980                          |           |
|                                                                               |              |                                | <i>Paracoccus</i> sp. BP8 (RQP04598.1)                | 7.0E-12/<br>30%/ 43%                             | 854                          |           |
|                                                                               |              |                                | <i>Paracoccus</i> sp. BP8 (RQP06839.1)                | 5.0E-12/<br>32%/ 43%                             | 612                          |           |
| Esterase CE_Ubrb<br>uncultured bacterium<br>(SIP63154)                        | 3.1.1.-      | 295                            | <i>Microbacteriaceae</i> bacterium BP8.4 (RQP12977.1) | 8.0E-05/<br>35%/ 48%                             | 309                          | [56]      |
| Arylamidase A<br><i>Paracoccus huijuniae</i><br>(AEX92978)                    | 3.4.11.2     | 465                            | <i>Paracoccus</i> sp. BP8 (RQP04489.1)                | 6.0E-25/<br>41%/ 52%                             | 471                          | [57]      |
| Amidase<br><i>Ochrobactrum</i> sp. TCC-2<br>(ANB41810)                        | 3.5.1.4      | 474                            | <i>Microbacteriaceae</i> bacterium BP8.4 (RQP11486.1) | 2.0E-47/<br>35%/49%                              | 475                          | [58]      |
|                                                                               |              |                                | <i>O. intermedium</i> BP8.5 (RQP19215.1)              | 6.0E-24/<br>39%/50%                              | 326                          |           |
| Urethanase<br><i>Lysinibacillus fusiformis</i><br>(KU353448)                  | 3.5.1.4      | 472                            | <i>Microbacteriaceae</i> bacterium BP8.4 (RQP12064.1) | 1.0E-60/<br>32%/ 48%                             | 499                          | [60]      |
| Carbaryl hydrolase <i>cahA</i><br><i>Arthrobacter</i> sp. RC100<br>(BAC15598) | 3.6.3.5      | 506                            | <i>Paracoccus</i> sp. BP8 (RQP06118.1)                | 1.0E-15/<br>35%/ 48%                             | 326                          | [61]      |

<sup>a</sup>Only genes with identity  $\geq$  30% are presented.

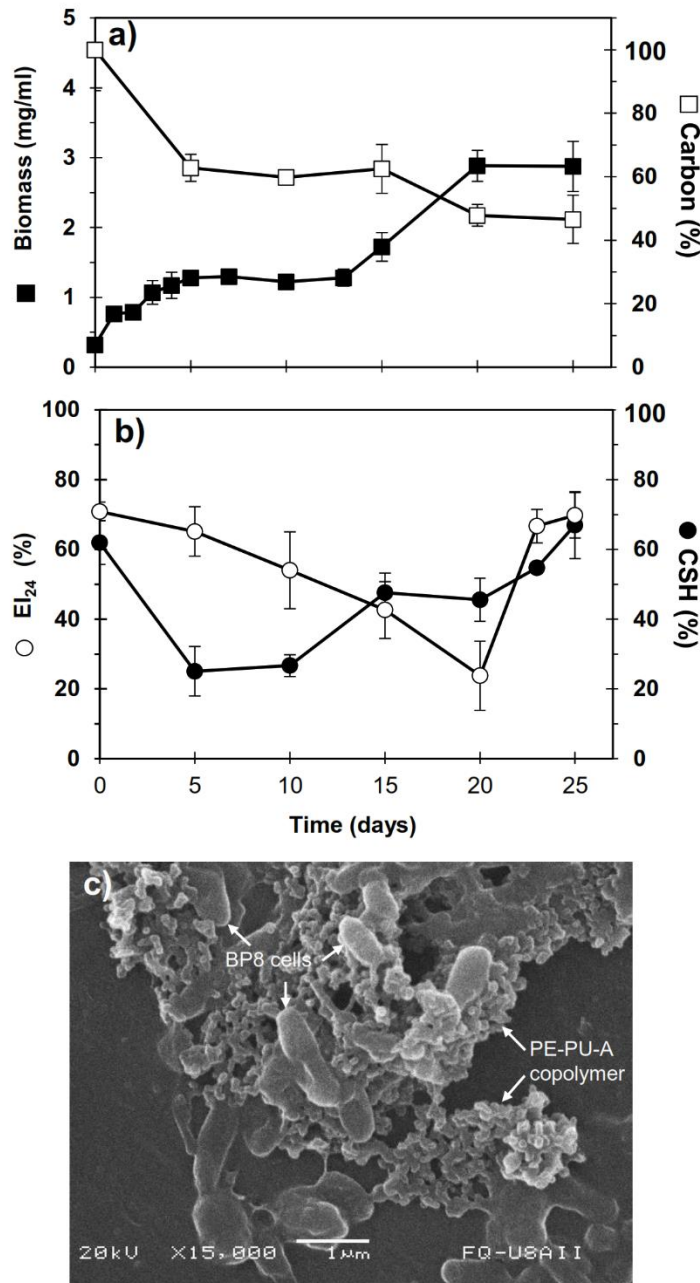

**Figure 1. Characteristics of the BP8 community growing in MM-PolyLack. a)** Growth and carbon consumption, **b)** emulsification index (EI<sub>24</sub>) and cell surface hydrophobicity (CSH) at different cultivation times; **c)** SEM micrograph of BP8 cells attached to the PE-PU-A copolymer at 10 days of cultivation. Bars represent standard deviation. n=3.

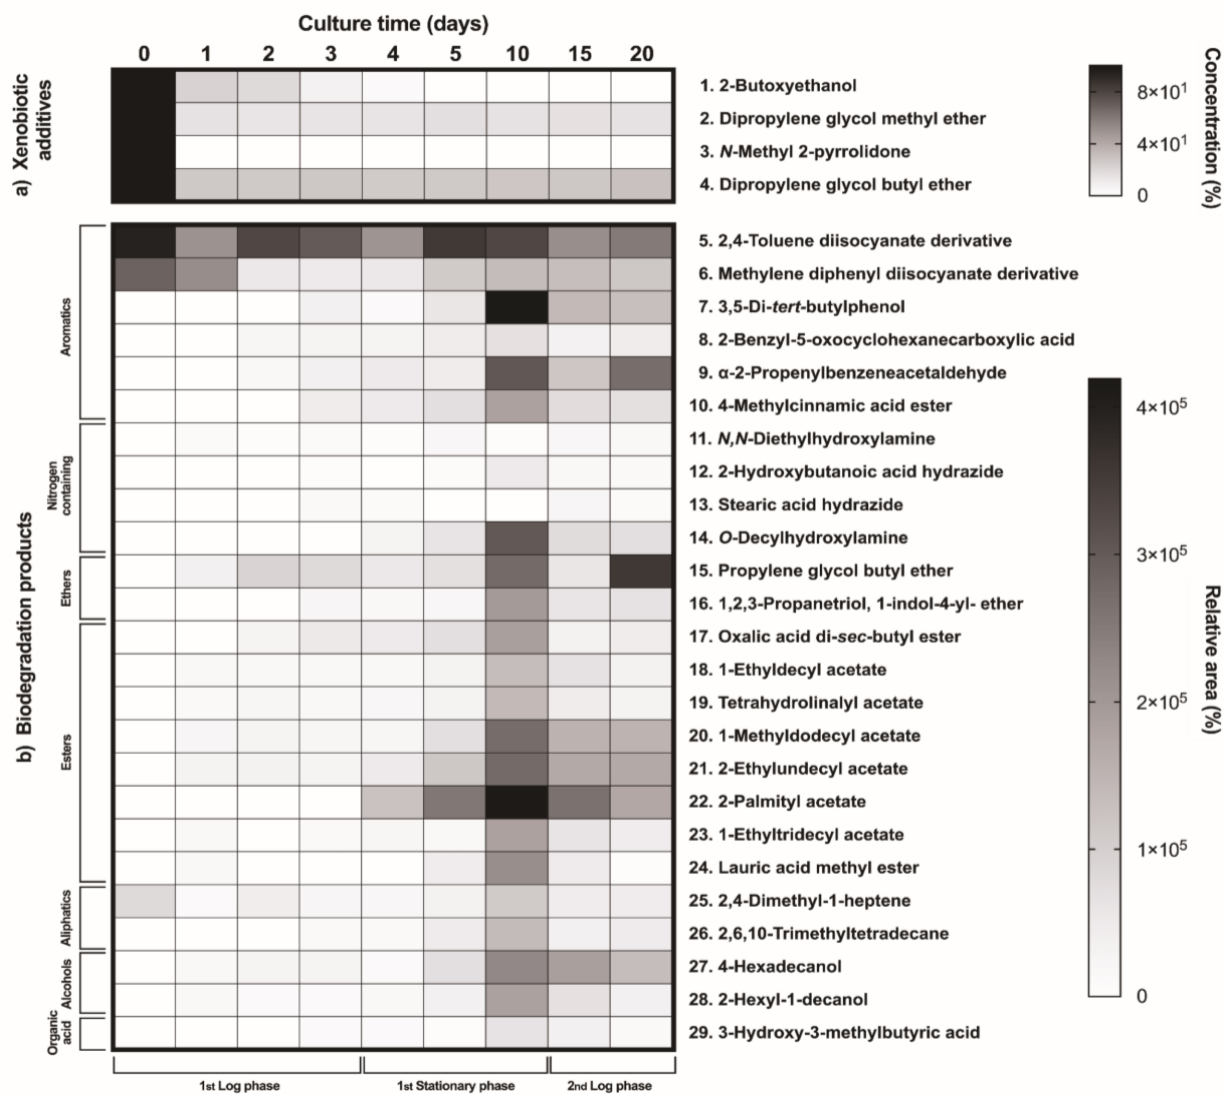

**Figure 2. Xenobiotic additives consumed (a) and PE-PU-A biodegradation products generated (b) by the BP8 community.** Cell-free supernatants were extracted at different culture times with chloroform:methanol and analyzed by GC-MS. **a)** Additives were quantified using standard curves for each compound and **b)** biodegradation products by analyzing their relative areas in independent chromatograms.  $n=3$ . Compounds with mass spectra similarity values over 700 were considered the same compounds of the Library hits. The numbers in the compounds correspond to signals in the chromatograms of Figure S2.

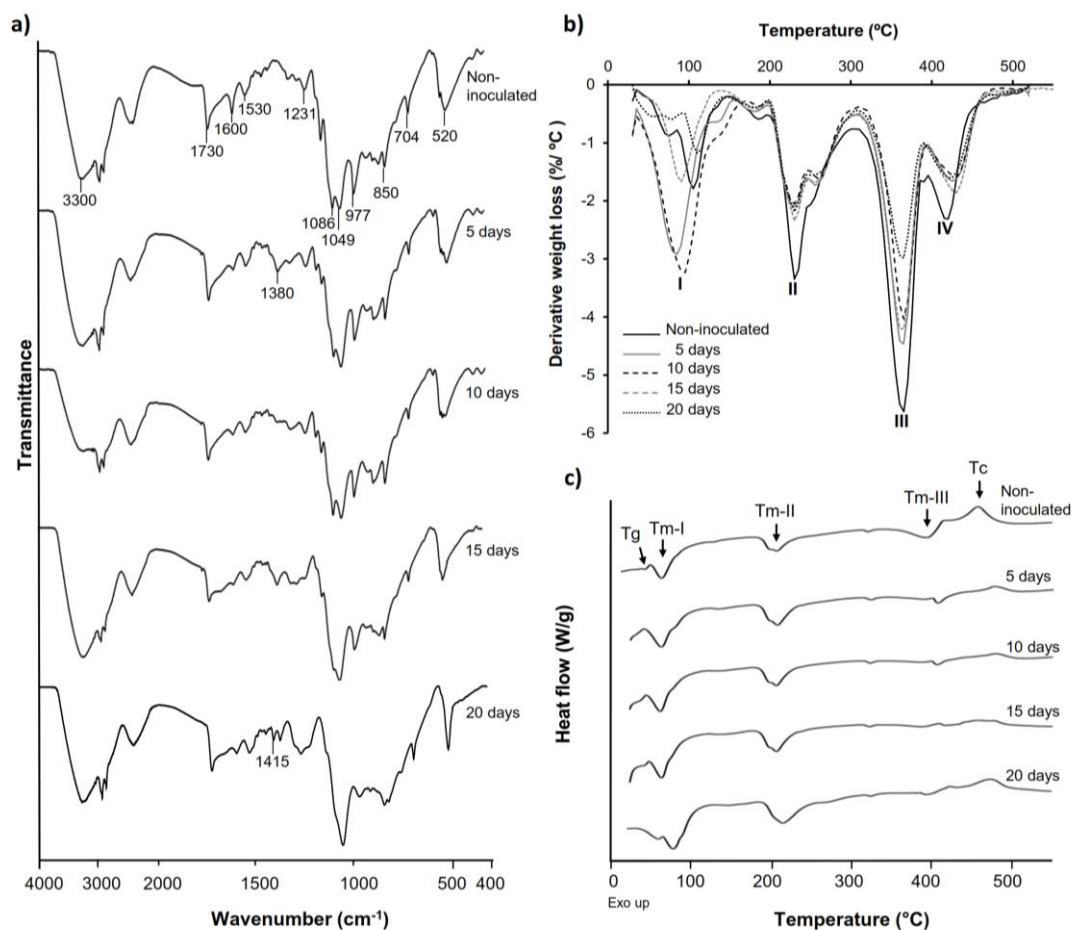

**Figure 3. Physical and chemical analyses of the aromatic PE-PU-A copolymer after incubation with the BP8 community. a) FTIR spectra. b) DTG analysis.** Thermal degradation stages correspond to the following functional groups: I. Low molecular weight compounds, II. Urethane, III. Ester, IV. Ether; **c) DSC analysis.** Glass transition temperature ( $T_g$ ) represents the relative amount of soft and hard segments; melting temperatures,  $T_m$ -I,  $T_m$ -II and  $T_m$ -III are associated with hard domains, and crystallization temperature ( $T_c$ ) represents heat-directed crystallization of copolymer chains.

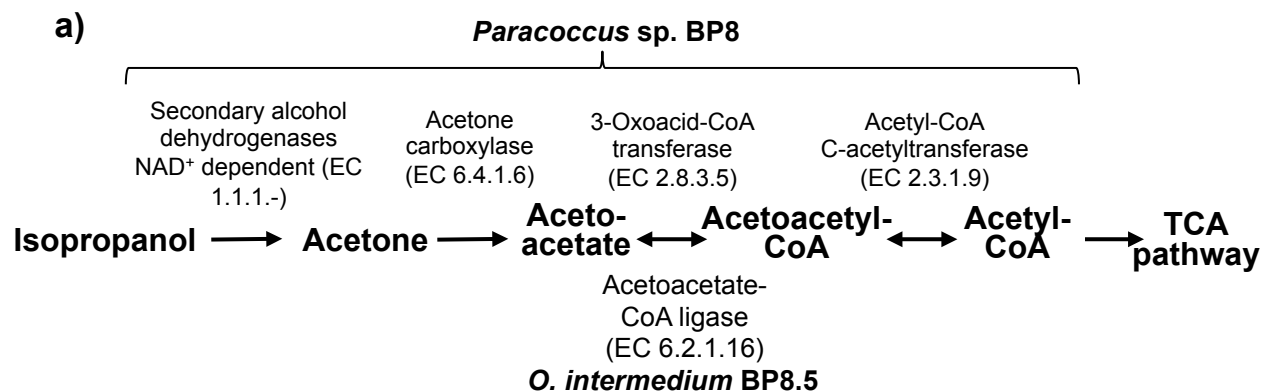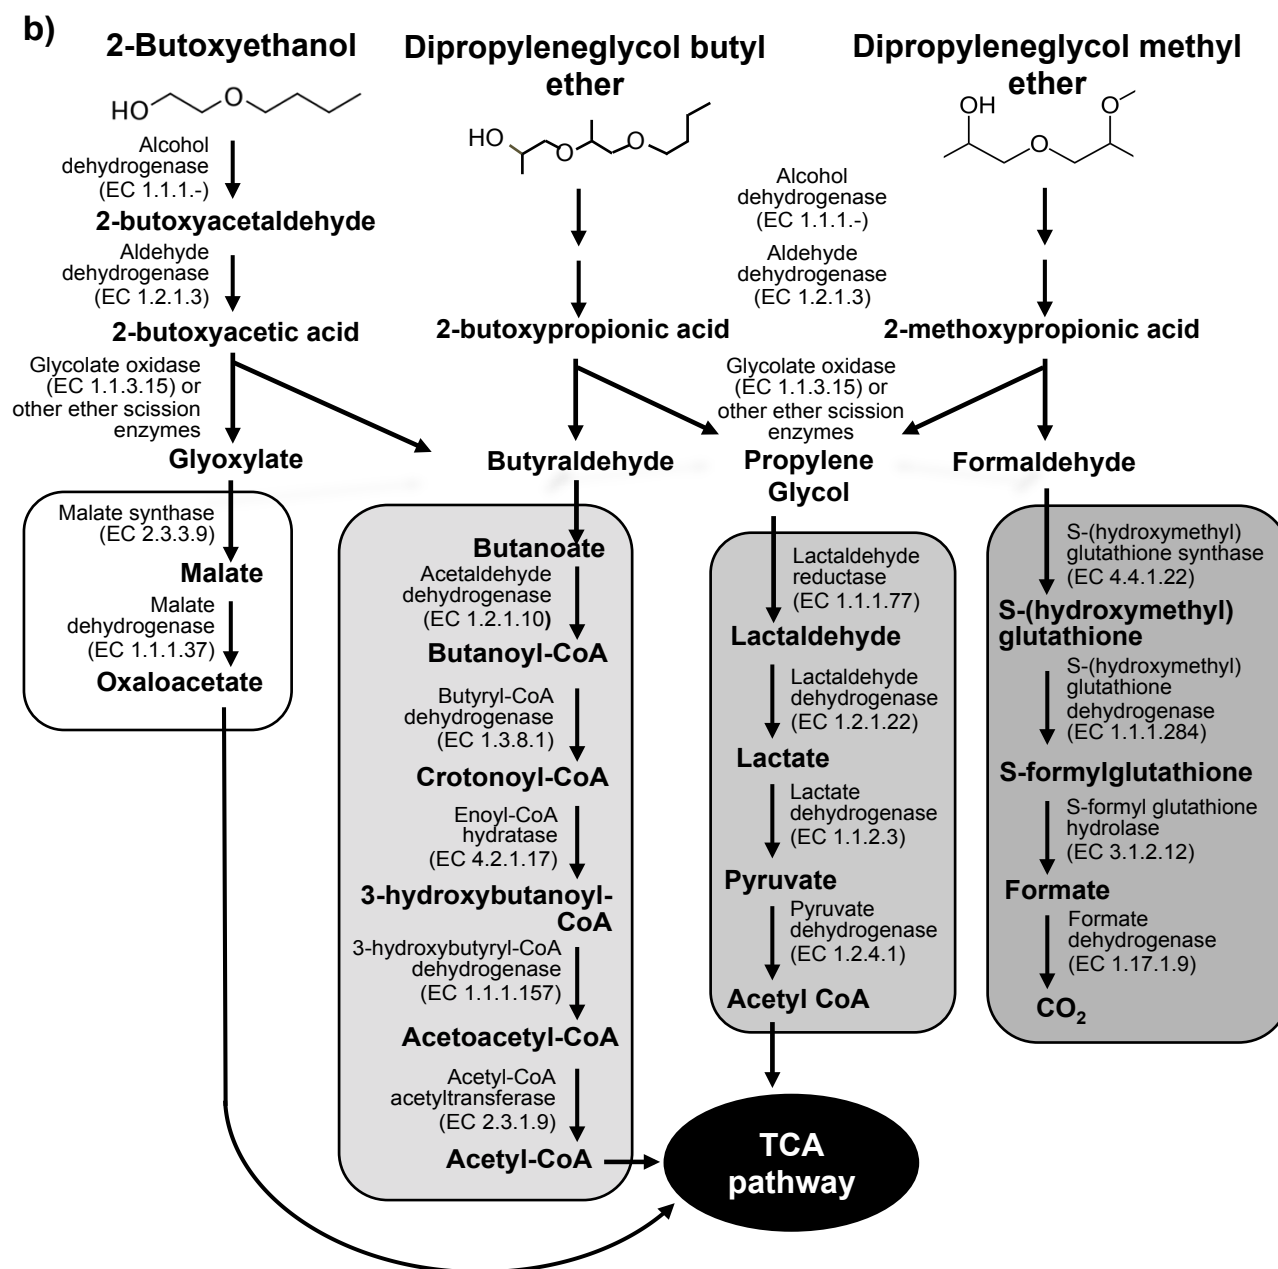

**Figure 4. Potential degradation pathways for isopropanol (a) and glycol eters (b) encoded in the BP8 metagenome.** **a)** *Paracoccus* sp. BP8 genome encodes ADH enzymes that can oxidize IP to acetone, but no genes encoding enzymes for acetone metabolism were found. Instead, the genes encoding the three subunits of acetone carboxylase that reductively transforms acetone to acetoacetate were found. Acetoacetate can be transformed to acetoacetyl-CoA by 3-oxoacid-CoA transferase activity, present in *Paracoccus* sp. BP8 or by acetoacetate-CoA ligase, present in *O. intermedium* BP8.5. Acetoacetyl CoA is transformed by acetyl-CoA C-acetyltransferase to acetyl CoA, that enters the TCA pathway encoded in the BP8 metagenome (See Table 1). **b)** Degradation of 2-BE could be carried out by subsequent oxidations of the hydroxy terminal group by PEG-DH and PEG-ALDH, followed by scission of the ether bond by glycolate oxidase or other ether scission enzymes to produce glyoxylate and butyraldehyde [5, 67]. Glyoxylate would be funneled to the glyoxylate metabolism (white rectangle) and butyraldehyde to the butanoate metabolism (light gray rectangle). DPGB and DPGM can also be degraded by initial oxidation of the hydroxy terminal groups and further be ether-cleaved by ether scission enzymes. The products of these processes would be butyraldehyde and propylene glycol from DPGB and propylene glycol and formaldehyde from DPGM. Propylene glycol can be funneled to the pyruvate metabolism (medium gray rectangle) and formaldehyde can be transformed by the methane metabolism (dark gray rectangle). Genes encoding homologs for PEG-DH and PEG-ALDH (*pegdh* and *pegc*) from *Sphingophyxis terrae* and *S. macrogoltabida*, the three subunits of glycolate oxidase (*glcD*, *glcE*, *glcF*) and other possible ether scission enzymes were identified in *Paracoccus* sp. BP8 (See Table 1). Pathways for glyoxylate, butanoate, pyruvate and methane metabolisms as well as the TCA pathway were fully reconstructed from the BP8 metagenome based on KEGG annotated genes, using KEGG Mapper.
